# Supplementary material
Source: PubMed Central journal article supplement (PMC6482823)
Supplement: NIHMS1020698-supplement-1.pdf [file NIHMS1020698-supplement-1.pdf]

## Supplementary figures

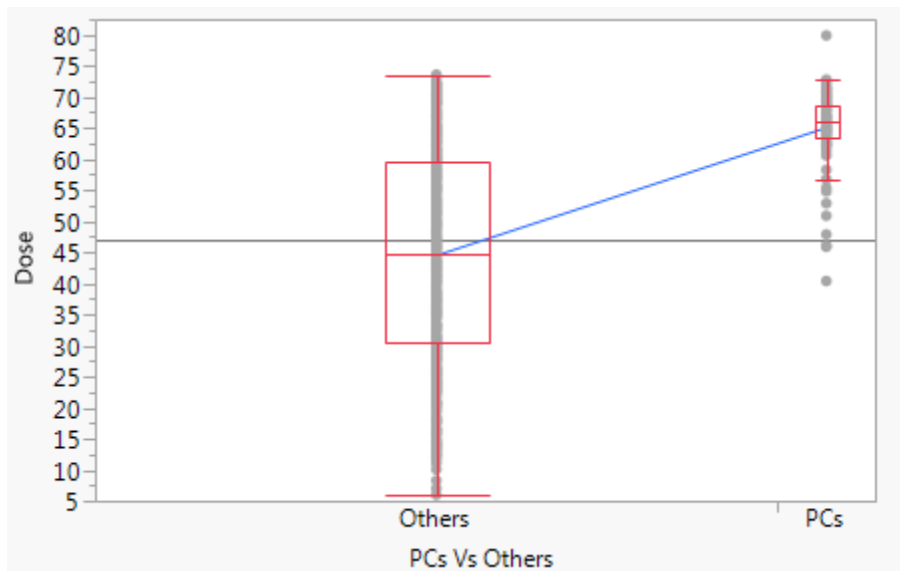

Figure (S1) Box plot graph showing the difference between the mean dose received by the pharyngeal constrictors which showed significant change of SI at Post-RT, and the remaining muscles. *Abbreviations:* PCs: pharyngeal constrictors
